# Supplementary material for: Calibration approaches for the measurement of aerosol multielemental concentration using spark emission spectroscopy
Source: Royal Society of Chemistry journal article supplement (doi:10.1039/c7ja00252a), 2018-01-01
Supplement: c7ja00252a1.pdf [file c7ja00252a1.pdf]

## Supplemental Information

### Multivariate Calibration Approaches for Measurement of Elemental Concentration of Aerosols

L. Zheng,<sup>a, b</sup> P. Kulkarni,<sup>a†</sup> and D. D. Dionysiou<sup>b</sup>

---

<sup>a.</sup> *Centers for Disease Control and Prevention, National Institute for Occupational Safety and Health, Cincinnati, OH 45226, USA.*

<sup>b.</sup> *Environmental Engineering and Science Program, Department of Biomedical, Chemical, and Environmental Engineering, University of Cincinnati, OH, 45221, USA.*

† Author to whom correspondence should be addressed to: Phone: (513) 841-4300; Fax: (513) 841-4545; Email: PSKulkarni@cdc.gov

### S1. Plots of PLS regression coefficients for each element

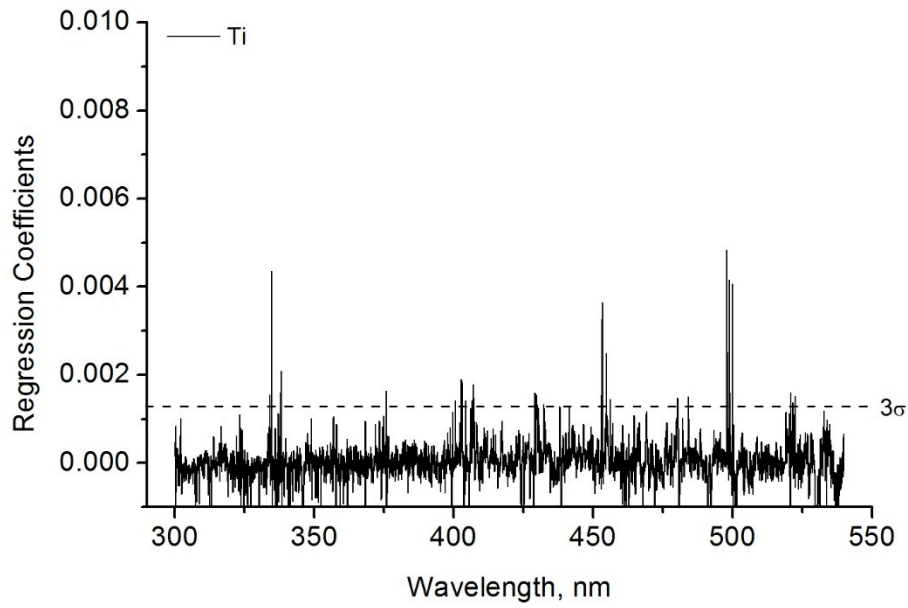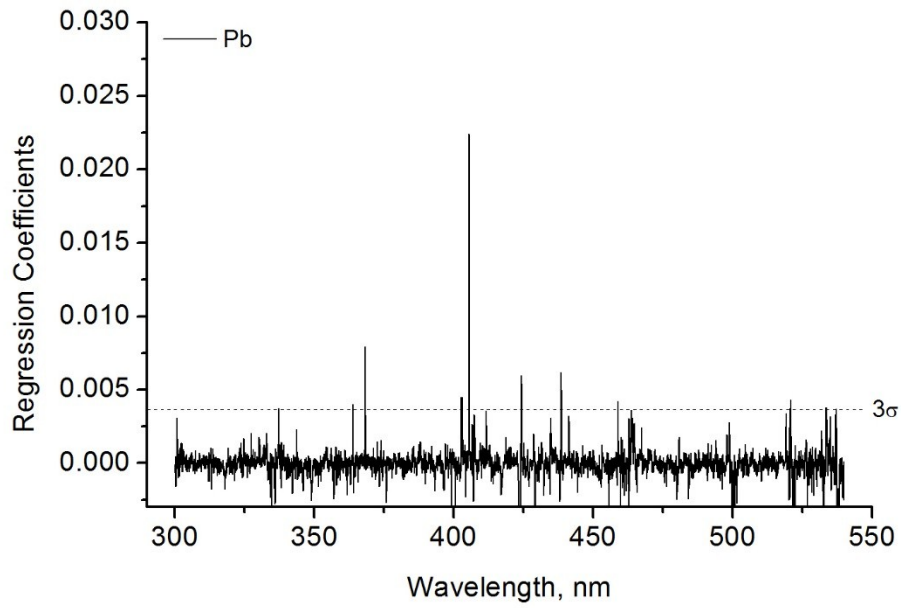

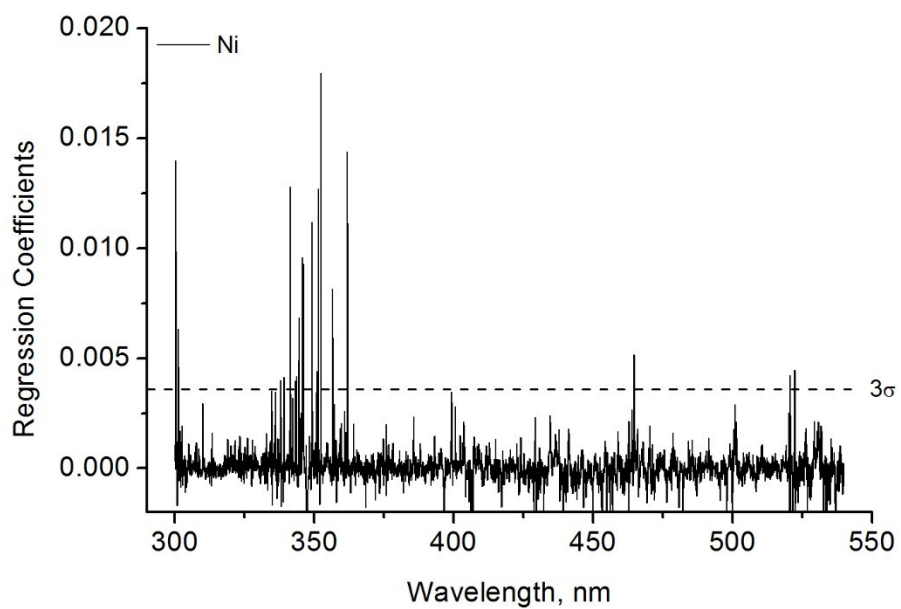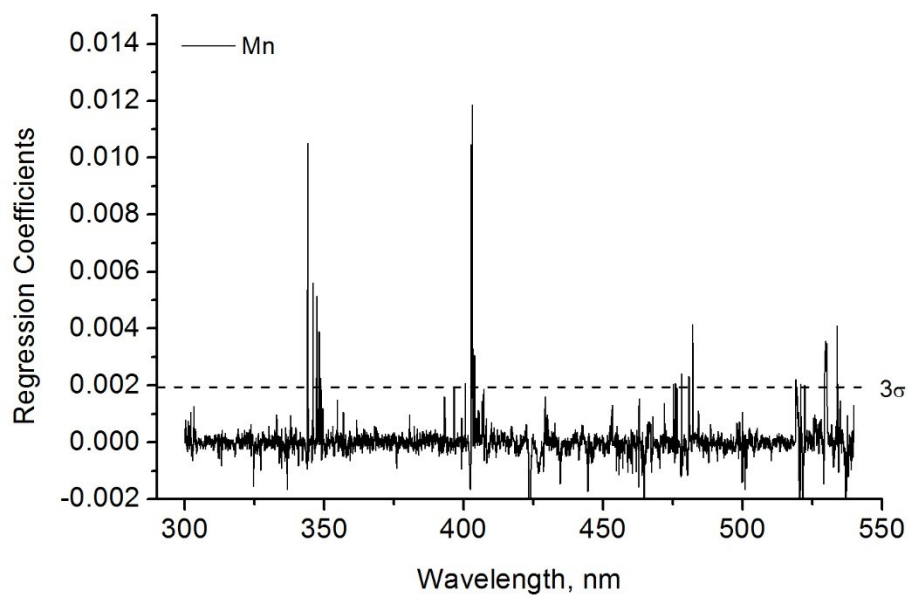

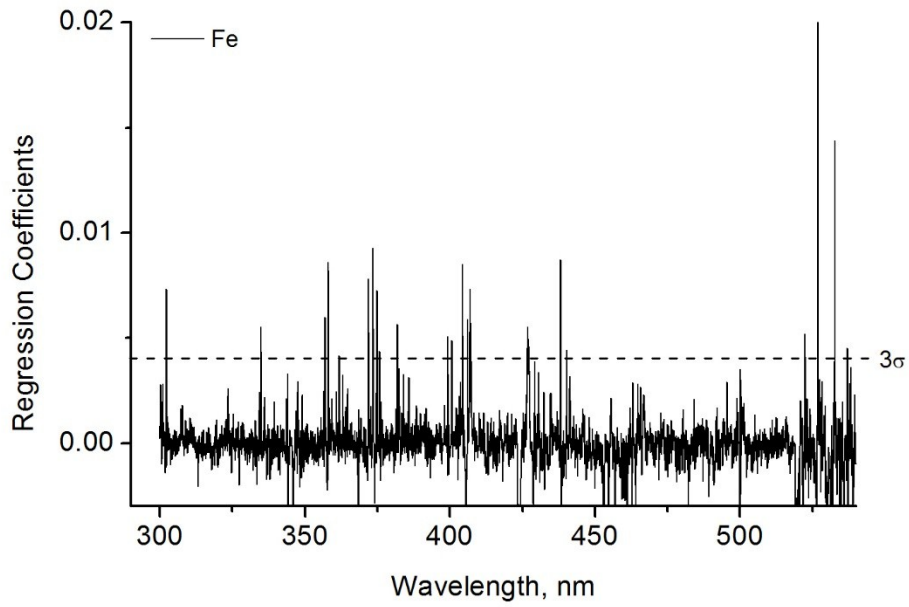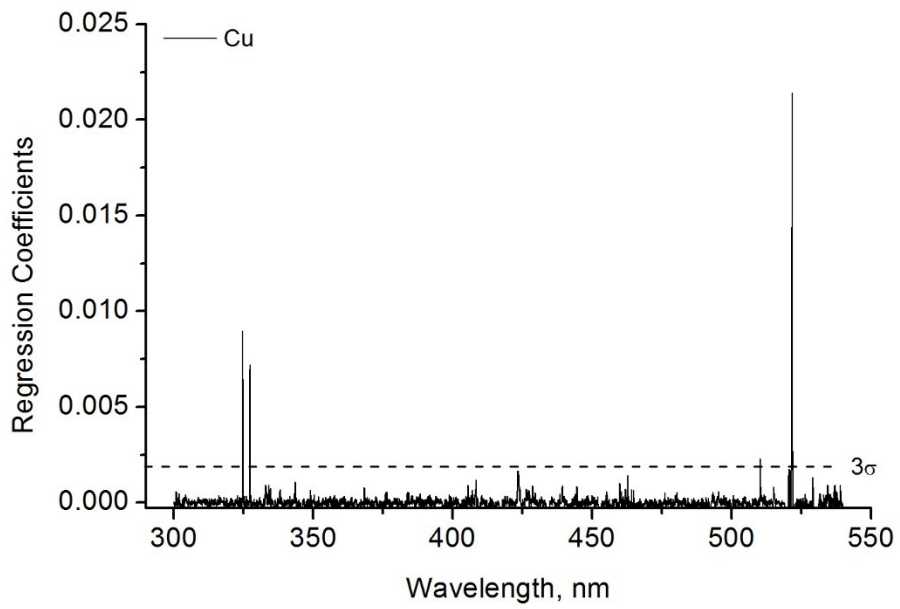

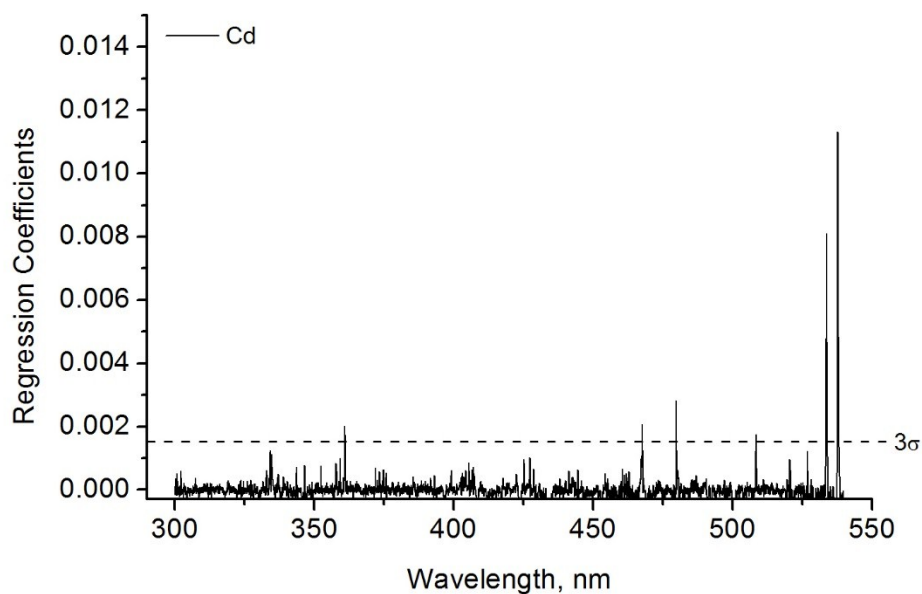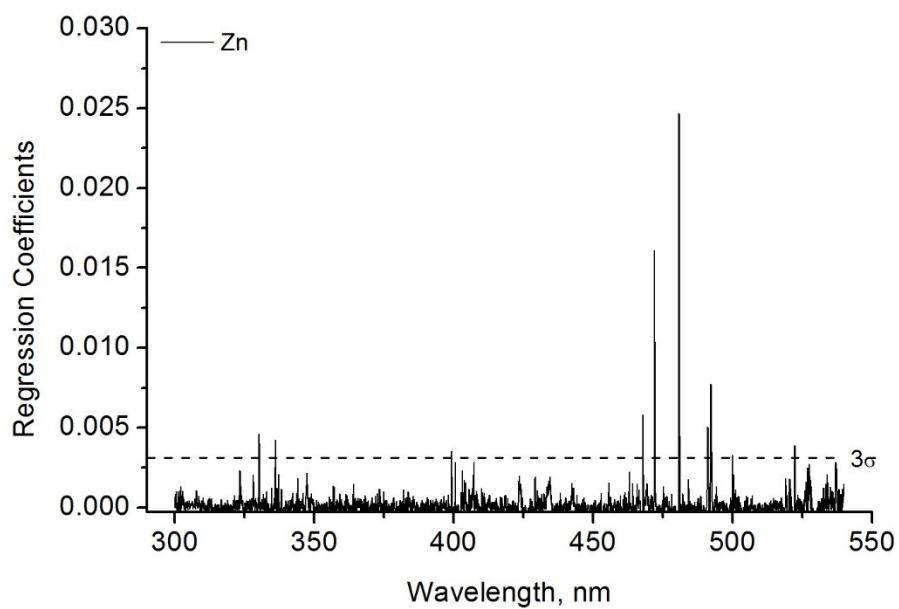

Fig. S1 PLS Regression coefficients for Mn, Fe, Ni, Cu, Zn, Cd, Pb, and Ti, by analysis of the full range spectra (300 – 540 nm)

## S2. Univariate calibration curves

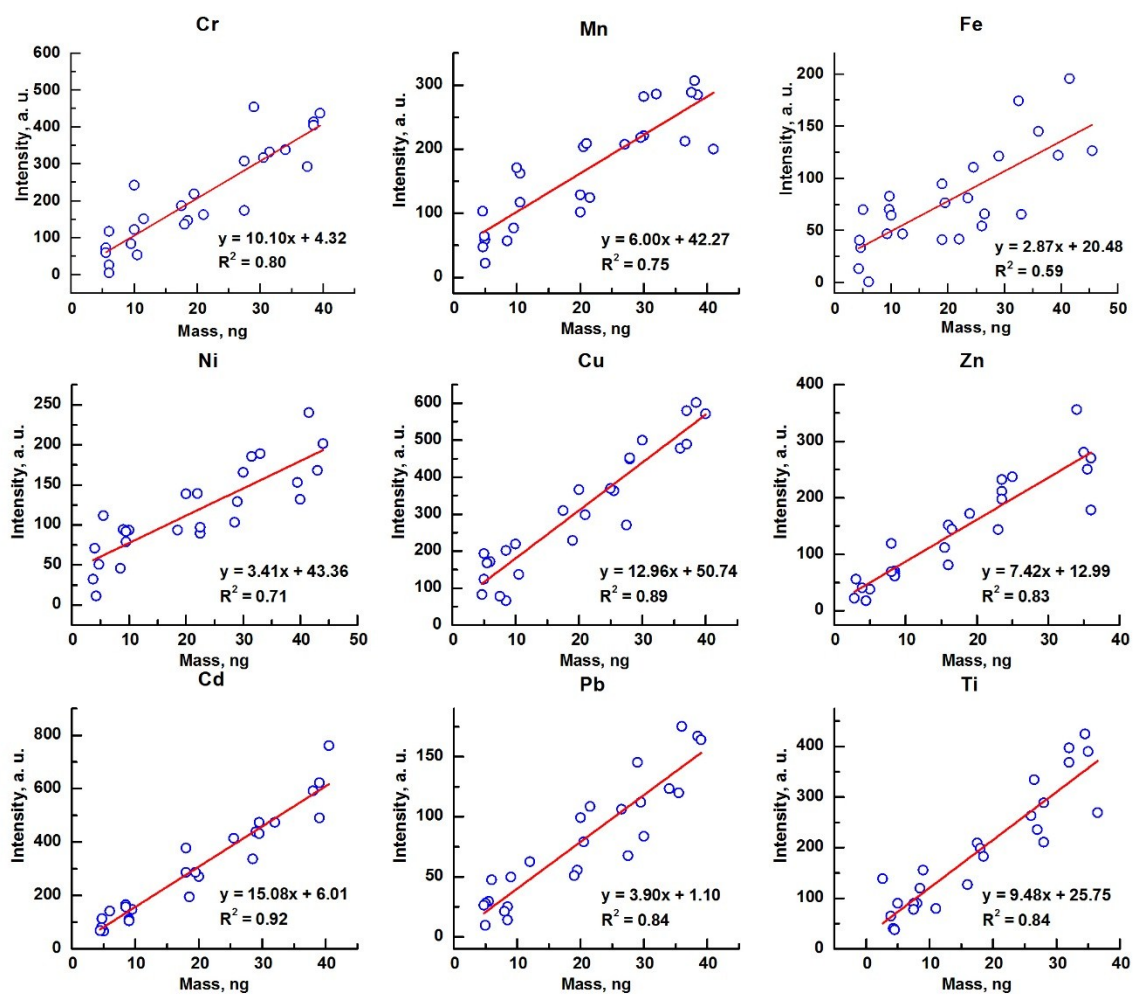

Fig. S2 Univariate calibration curves for all the nine elements constructed using the 25 multielement samples in the training set.
